# Supplementary material
Source: PubMed Central journal article supplement (PMC4566129)
Supplement: mp5b00168_si_001.pdf [file mp5b00168_si_001.pdf]

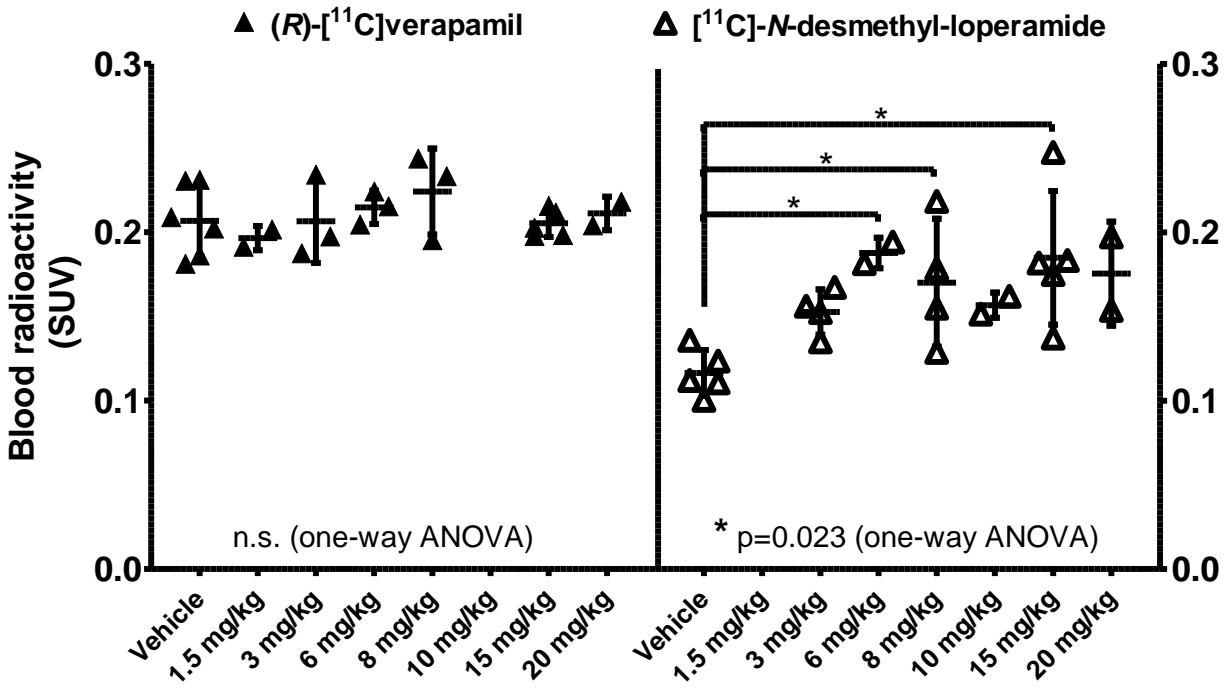

**Figure S1.** Blood radioactivity concentrations (standardized uptake value, SUV) for (R)-[<sup>11</sup>C]verapamil and [<sup>11</sup>C]-N-desmethyl-loperamide in vehicle and tariquidar treated C57BL/6N wild-type mice determined at the end of the PET scan (i.e. at approximately 63 minutes after radiotracer injection).

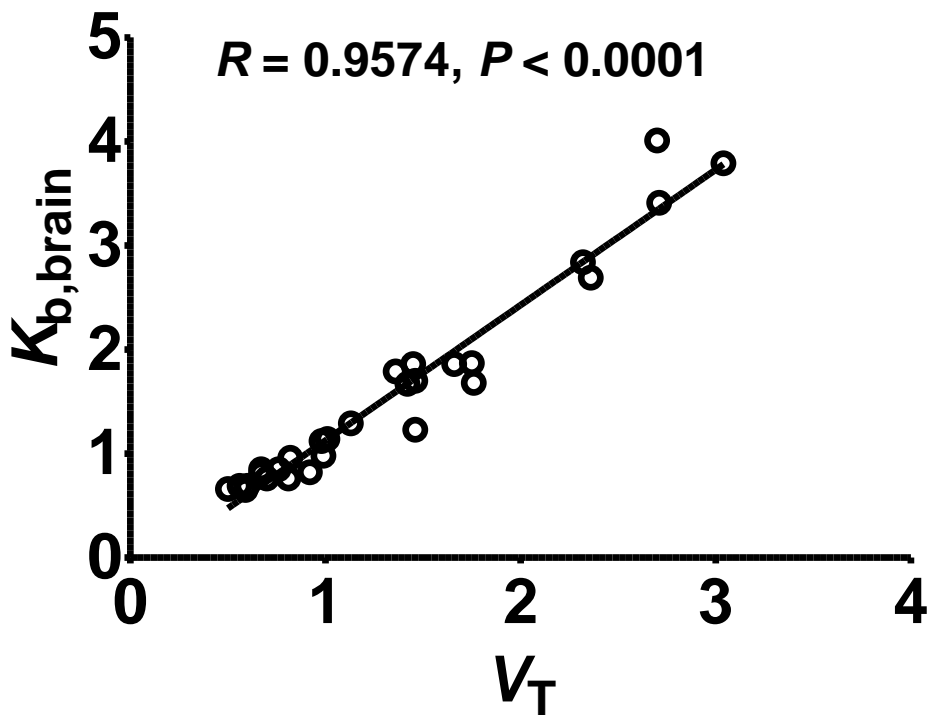

**Figure S2.** Correlation between brain-to-blood concentration ratio measured at the end of the PET scan (i.e. from 50 minutes to 60 minutes after radiotracer injection) ( $K_{b,brain}$ ) and total distribution volume ( $V_T$ ) in whole-brain gray matter obtained by using a 2-tissue 4-rate constant compartment model for (R)-[ $^{11}\text{C}$ ]verapamil PET scans in healthy human volunteers without and with administration of different tariquidar doses (2-8 mg/kg body weight).  $R$  = Pearson correlation coefficient.
